# Supplementary material
Source: publisher figshare collection journal article supplement (https://frontiersin.figshare.com/ndownloader/files/24688016)
Supplement: Supplementary file 1 [file 24688016]

## Sheet: Sheet1
					Upper rhamphotheca				Lower rhamphotheca				feathers	claws
Taxon	Specimen No.	Femur length	Skull length	Skull:femur	Length total	Length rostral	Depth rostral	Depth dorsal (at level of rostral margin of the external nares)	Length total	Length rostral	Depth rostral	Depth ventral
Confuciusornis dui	IVPP V11553	33.8	42.58	1.25976	16.75	6.8-7.9	1.7	0.6	10.42	5.88	?	-	x
Confuciusornis sanctus	IVPP V12352	41.9	60.64	1.44726	29.48	6-7	2.8	0.9	3.2	1.2	0.64	-		x
Confuciusornis sp.	STM13-133	37.21	58.43	1.57028	35.86	9.13	1.77	0.736	17.7	9.04	2.47	tapers constantly	x	x
Confuciusornis sp.	STM13-126	-	55.85		26.8	5.9	5.09	tapers constantly	19.02	6.66	1.52	tapers constantly	x	x
Eoconfuciusornis zhengi	IVPP V11977	35	41.46	1.18457	2.16	1.3	0.83	-	6.57	3.07	1.6	-	x
Confuciusornis sanctus	BMNHC-PH986	54.1	75.1	1.38817	20.51	6.79	2.92	tapers constantly	9.81	6.81	2.27	-	x	x
estimate
